# Supplementary material for: Applicability of new degradable hypericin-polymer-conjugates as photosensitizers: principal mode of action demonstrated by in vitro models
Source: Royal Society of Chemistry journal article supplement (doi:10.1039/c4pp00251b), 2014-09-26
Supplement: c4pp00251b1.pdf [file c4pp00251b1.pdf]

## Supplementary Material

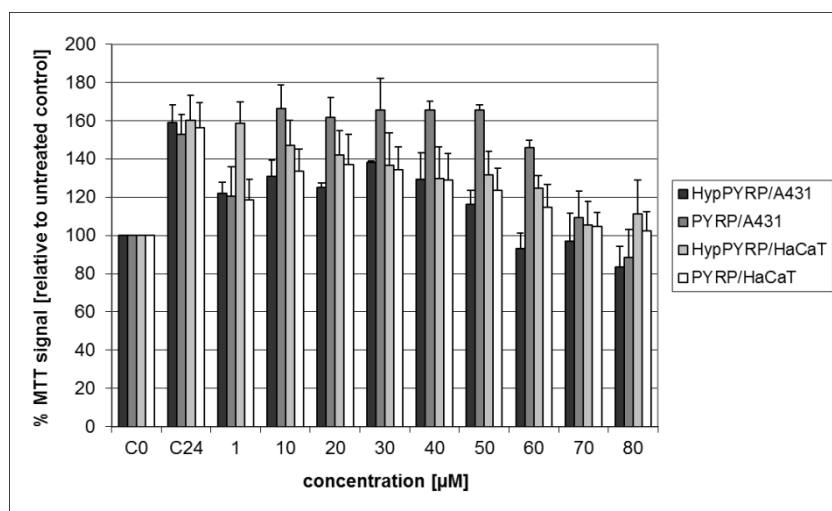

Figure ESI 1. Dark effects of the non-covalently bound photosensitizer HypPYRP and the corresponding polymer (PYRP) in A431 and HaCaT cells. Cell viability in % was related to the respective untreated control  $C_0$ .

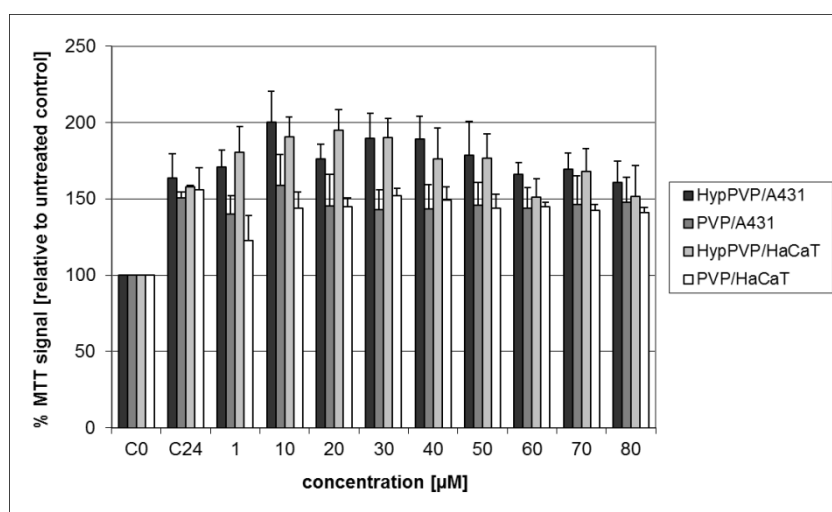

Figure ESI 2. Dark cytotoxicity of the non-covalently bound photosensitizer HypPVP and the corresponding polymer (PVP) in A431 and HaCaT cells. Cell survival in % was related to the respective untreated control  $C_0$ .

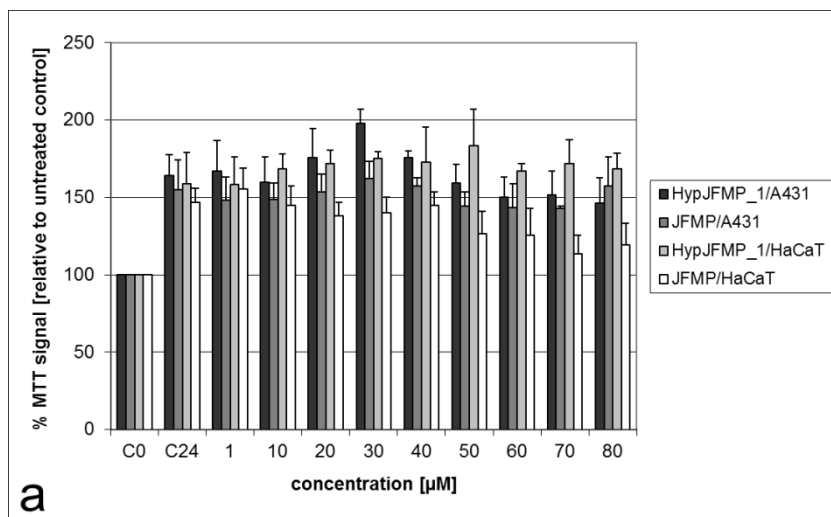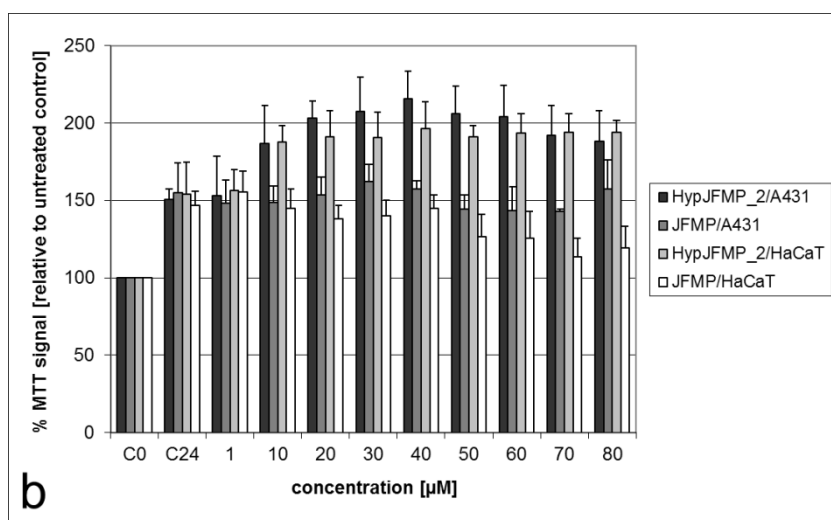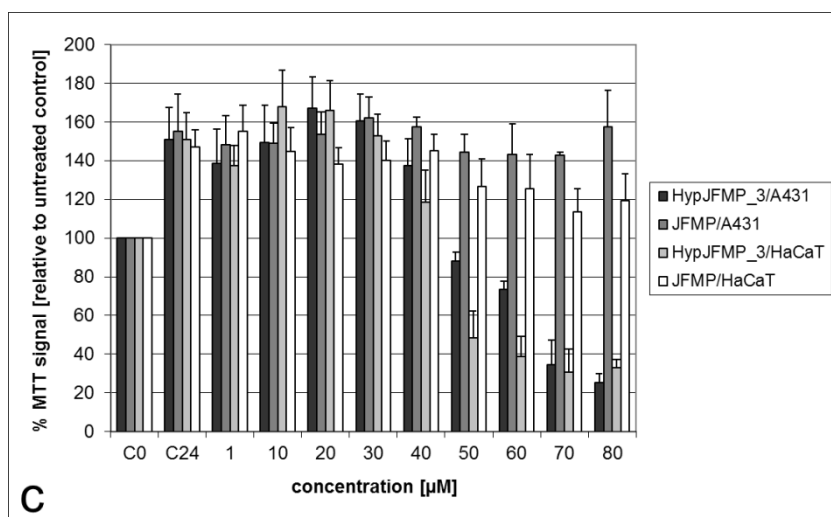

Figure ESI 3. Dark cytotoxicity of the covalently bound photosensitizers (a) HypJFMP\_1, (b) HypJFMP\_2 and (c) HypJFMP\_3 and the corresponding polymer (JFMP) in A431 and HaCaT cells. Cell survival in % was related to the respective untreated control  $C_0$ .

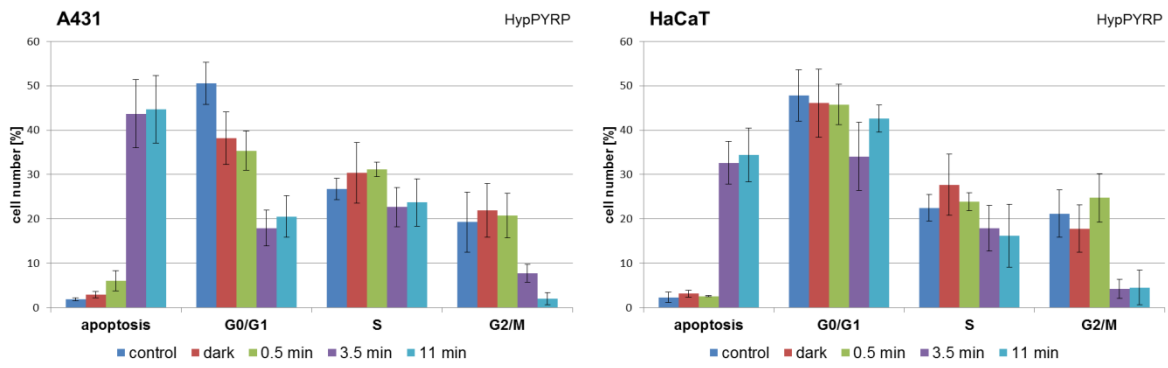

Figure ESI 4. Light dose-dependent cell cycle alterations and apoptosis induction following PDT with 5 µm HypPYRP in A431 and HaCaT cells. DNA content/stainability analyzed 8 hours post irradiation. Values represent % of total cells.

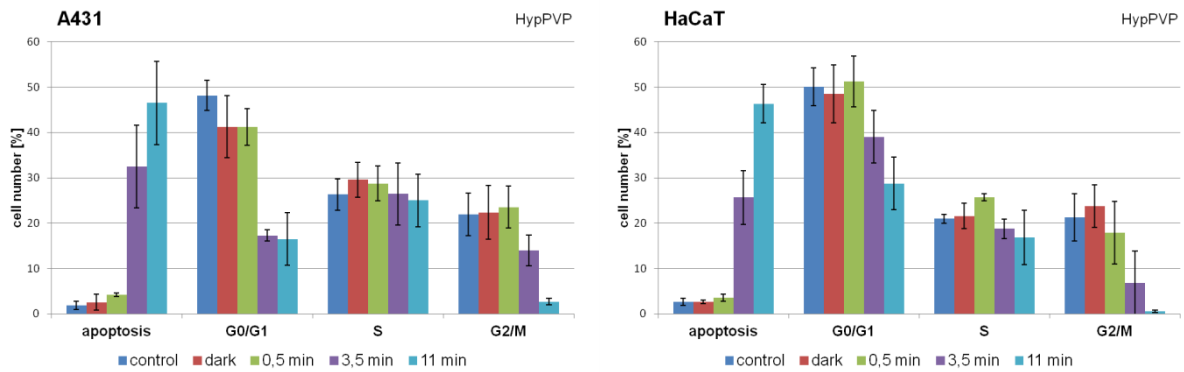

Figure ESI 5. Light dose-dependent cell cycle alterations and apoptosis induction following PDT with 5 µm HypPVP in A431 and HaCaT cells. DNA content/stainability analyzed 8 hours post irradiation. Values represent % of total cells.

**a**

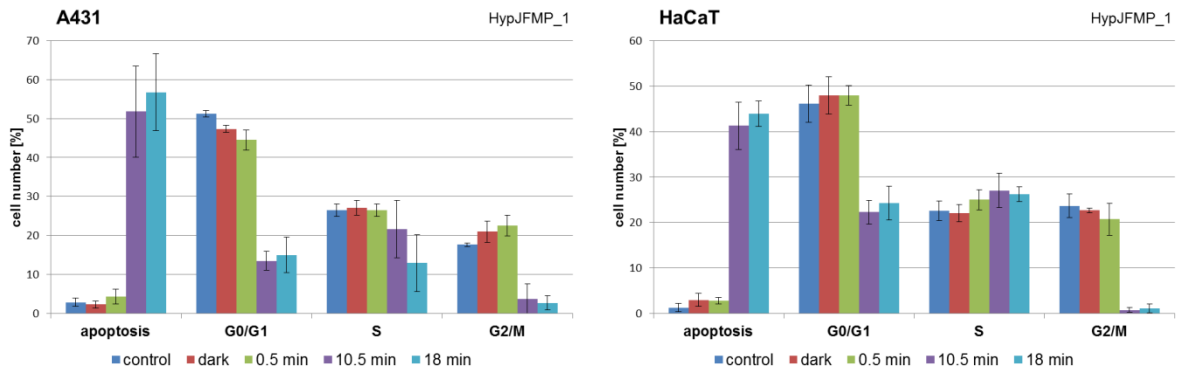

**b**

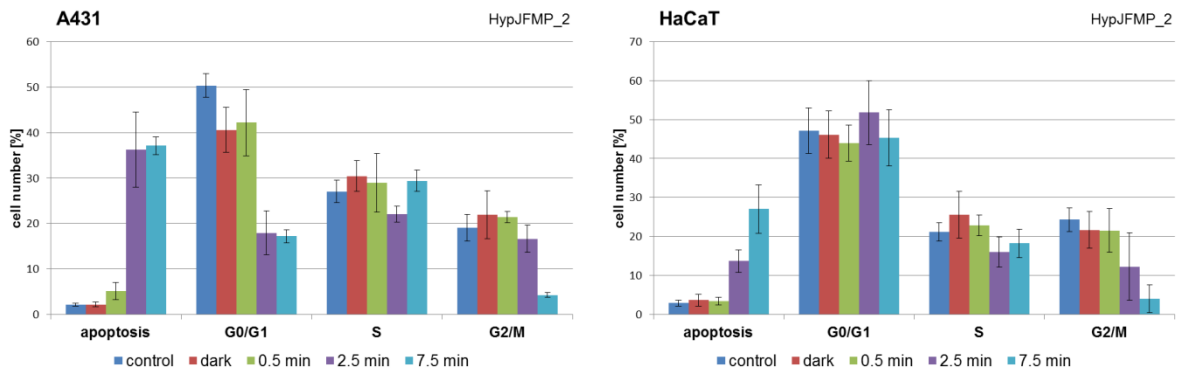

**c**

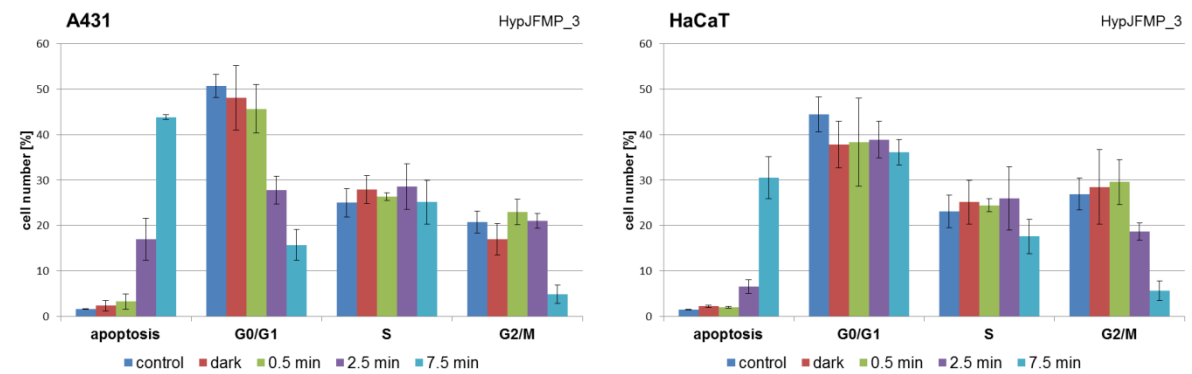

Figure ESI 6. Light dose-dependent cell cycle alterations and apoptosis induction following PDT with 5  $\mu$ m (a) HypJFMP\_1, (b) HypJFMP\_2 and (c) HypJFMP\_3 in A431 and HaCaT cells. DNA content/stainability analyzed 8 hours post irradiation. Values represent % of total cells.
